# Supplementary material for: Upregulation of Plasminogen Activator Inhibitor-1 in Irradiated Recipient Arteries and Veins from Free Tissue Transfer Reconstruction in Cancer Patients
Source: Hindawi journal article supplement (doi:10.1155/2018/4058986), 2018-10-04
Supplement: f1 [file 4058986.f1.pdf]

| Age | Sex | Dose | Time | Smoking | CVD | Flap | A/V/AV | T   | N   | M   | Site    | Type |
|-----|-----|------|------|---------|-----|------|--------|-----|-----|-----|---------|------|
| 77  | F   | 54   | 5    | Y       | Y   | RFF  | AV     | 3   | 0   | 0   | Gingiva | SCC  |
| 30  | M   | 68   | 14   | N       | N   | RFF  | AV     | 3   | 2b  | 0   | BOT/FOM | SCC  |
| 48  | M   | 64   | 146  | N       | N   | FIB  | AV     | N/A | N/A | N/A | Eyelid  | SC*  |
| 50  | M   | 64   | 90   | N       | N   | RFF  | AV     | 4   | 2   | 0   | Tongue  | MEC  |
| 54  | M   | 68   | 271  | N       | N   | FIB  | AV     | 2   | 2b  | 0   | BOT     | SCC* |
| 64  | M   | 64   | 215  | N       | Y   | FIB  | AV     | 2   | 0   | 0   | FOM     | SCC  |
| 68  | M   | 64   | 48   | N       | Y   | RFF  | AV     | 4   | 0   | 0   | Gingiva | SCC  |
| 47  | F   | 68   | 7    | N       | N   | RFF  | V      | 4   | 0   | 0   | Gingiva | SCC  |
| 58  | F   | 50   | 450  | N       | N   | DIEP | V      | N/A | N/A | N/A | Breast  | DUC  |
| 59  | M   | 68   | 139  | N       | Y   | FIB  | V      | 3   | 0   | 0   | BOT     | SCC* |
| 59  | M   | 54   | 7    | Y       | N   | RFF  | V      | 4a  | 1   | 0   | FOM     | SCC  |
| 72  | M   | 68   | 15   | N       | N   | ALT  | V      | T1§ | 0   | 0   | Skin    | SCC  |
| 50  | F   | 60   | 22   | N       | Y   | RFF  | A      | 3   | 0   | 0   | Tongue  | SCC  |
| 62  | M   | 68   | 290  | N       | Y   | FIB  | A      | 3   | 0   | 0   | BOT     | SCC* |
| 63  | M   | 68   | 9    | N       | N   | FIB  | A      | 4   | 2b  | 0   | Gingiva | SCC  |
| 63  | F   | 66   | 650  | Y       | N   | ALT  | A      | 4   | 1   | 0   | HYP     | SCC  |
| 73  | F   | 64   | 170  | N       | N   | FIB  | A      | 2   | 0   | 0   | Gingiva | SCC* |

*Appendix 1 Demography of the patient cohort. Dose = total dose in Gy; Time = weeks elapsed since the conclusion of radiotherapy; Y = yes; N = no; CVD = cardiovascular disease (peripheral vascular disease, myocardial infarction, cerebral infarction); RFF = radial forearm flap; FIB = fibular flap; DIEP = deep inferior epigastric perforator; ALT = anterior lateral thigh; AV = artery and vein; V = vein only; A = artery only; T = tumor extent; N = regional nodes; M = metastasis; SCC = squamous cell carcinoma; BOT = base of tongue; FOM = floor of mouth; N/A = not applicable or known; SC = sebaceous carcinoma; \* = flap indication osteoradionecrosis of mandible; MEC = mucoepidermoid carcinoma; DUC = ductal carcinoma; § = initial TNM stage, later presented with regional metastases; HYP = hypopharynx.*
